# Supplementary material for: Prognostic Value of Admission Peak NT-proBNP Combined with Culprit Plaque Types for Predicting Cardiovascular Risk in ST-Segment Elevated Myocardial Infarction: An Optical Coherence Tomography Study
Source: MDPI journal article supplement (doi:10.3390/jcdd9120466), 2022-12-18
Supplement: s1 [file s1]

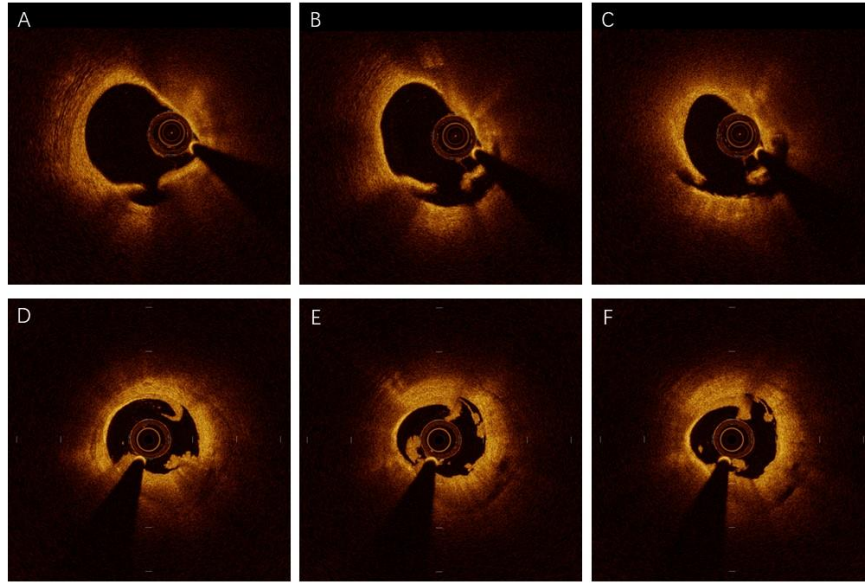

**Supplemental Figure S1.** Representative optical coherence tomography images for plaque rupture and non-plaque rupture. (A-C) Plaque rupture; (D-F) Non-plaque rupture.

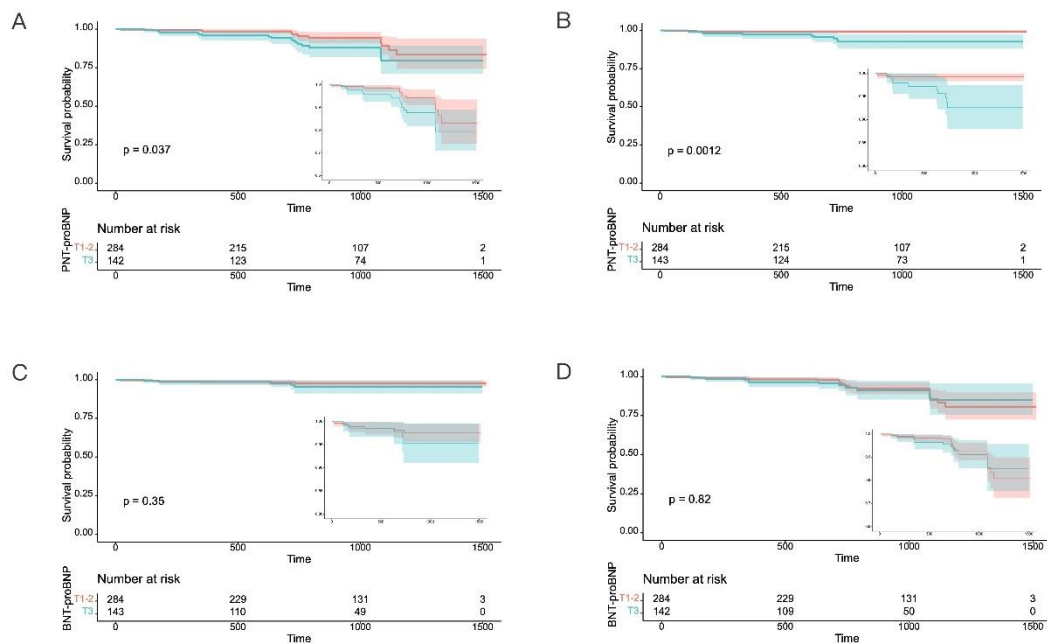

**Supplemental Figure S2.** Kaplan-Meier curves for cumulative rates of MACE and death according to peak and baseline value of NT-proBNP. (A) MACE for peak value of NT-proBNP; (B) Death for peak value of NT-proBNP; (C) Death for baseline value of NT-proBNP; (D) MACE for baseline value of NT-proBNP. PNT-proBNP, peak value of NT-proBNP; BNT-proBNP, baseline value of NT-proBNP.

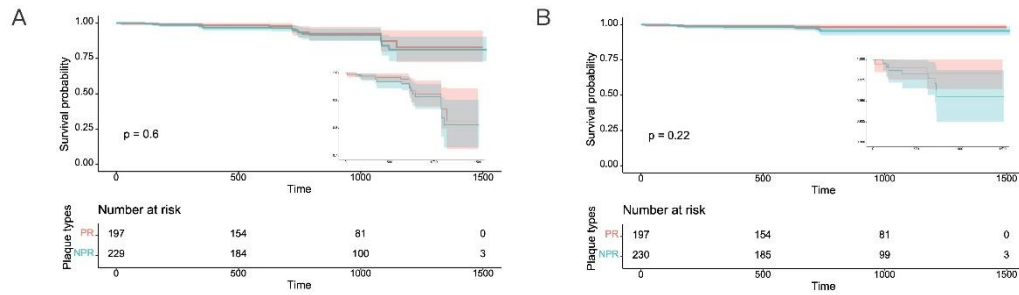

**Supplemental Figure S3.** Kaplan-Meier curves for cumulative rates of MACE and death according to plaque phenotype. (A) MACE for plaque rupture; (B) Death for non-plaque rupture. PR, plaque rupture; NPR, non-plaque rupture.

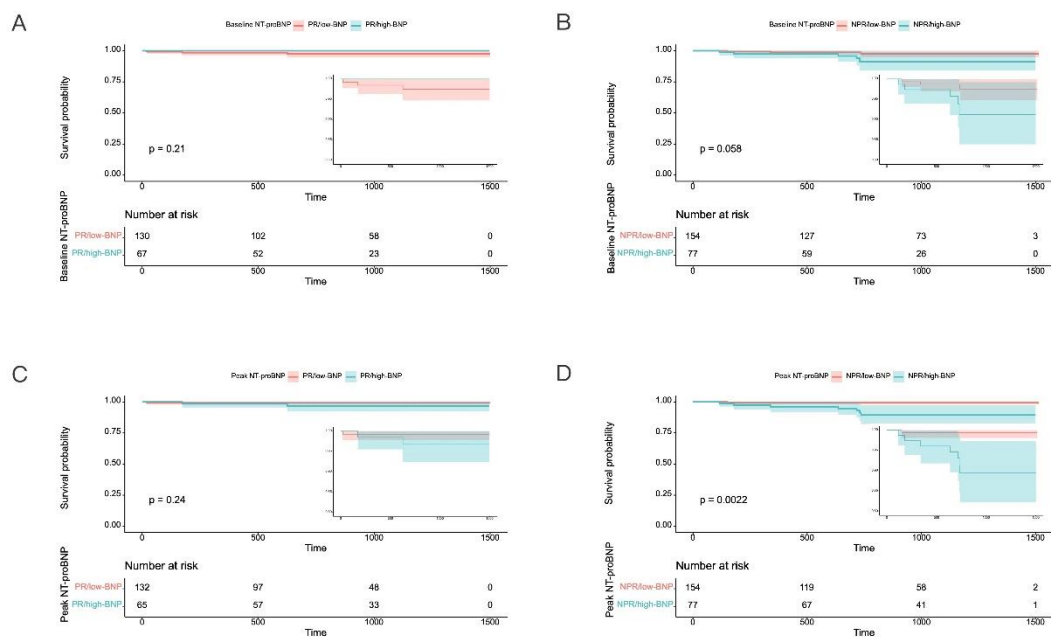

**Supplemental Figure S4.** Kaplan-Meier curves for cumulative death rate according to peak or baseline value of NT-proBNP and plaque phenotype. (A) Death for baseline value of NT-proBNP in patients with PR; (B) Death for baseline value of NT-proBNP in patients with NPR; (C) Death for peak value of NT-proBNP in patients with PR; (D) Death for peak value of NT-proBNP in patients with NPR. PR, plaque rupture; NPR, non-plaque rupture.

**Supplemental Table S1.** Hazard Ratio to MACE According to peak value of NT-proBNP in Plaque Rupture and Non-Plaque rupture

| Group                 | Crude model         |               | Adjust model I      |                | Adjust model II     |                | Adjust model III      |                |
|-----------------------|---------------------|---------------|---------------------|----------------|---------------------|----------------|-----------------------|----------------|
|                       | Crude HR (95%CI)    | Crude p value | Adjust I HR (95%CI) | Adjust p value | Adjust II HR 95%CI) | Adjust p value | Adjust III HR (95%CI) | Adjust p value |
| <b>PR<sup>a</sup></b> |                     |               |                     |                |                     |                |                       |                |
| Death                 | 3.824(0.346-42.243) | 0.274         | 2.739(0.241-31.122) | 0.416          | 1.831(0.131-25.632) | 0.653          | 1.423(0.033-62.052)   | 0.855          |
| MI                    | 1.476(0.330-6.600)  | 0.610         | 1.100(0.240-5.030)  | 0.902          | 1.040(0.178-6.056)  | 0.966          | 1.343(0.103-17.501)   | 0.822          |
| Stroke                | 0.551(0.057-5.307)  | 0.606         | 0.430(0.043-4.276)  | 0.472          | 0.321(0.027-3.796)  | 0.367          | 1.397(0.040-49.058)   | 0.854          |
| MACE composite        | 1.366(0.473-3.943)  | 0.564         | 0.965(0.325-2.863)  | 0.949          | 0.976(0.322-2.961)  | 0.966          | 0.788(0.219-2.837)    | 0.716          |

| NPR*           |                       |        |                     |        |                       |        |                       |        |
|----------------|-----------------------|--------|---------------------|--------|-----------------------|--------|-----------------------|--------|
| Death          | 12.688(1.558-103.324) | 0.018* | 9.319(1.104-78.673) | 0.040* | 11.789(1.318-105.473) | 0.027* | 15.943(1.220-208.347) | 0.035* |
| MI             | 1.437(0.320-6.440)    | 0.636  | 1.292(0.275-6.077)  | 0.746  | 1.889(0.344-10.379)   | 0.464  | 2.253(0.153-33.085)   | 0.554  |
| Stroke         | 2.385(0.532-10.692)   | 0.256  | 2.287(0.484-10.800) | 0.296  | 2.050(0.427-9.846)    | 0.370  | 2.238(0.399-12.548)   | 0.360  |
| MACE composite | 2.629(1.086-6.363)    | 0.032* | 2.372(0.943-5.966)  | 0.066  | 2.793(1.059-7.367)    | 0.038* | 3.328(1.019-10.868)   | 0.046* |

Data presented are HRs and 95% CI. Adjust I model adjusts for sex and age; Adjust II model adjusts for adjust I plus smoke, hypertension, hyperlipidemia, diabetes mellitus and BMI; Adjust III model adjusts for adjust II + white blood cell counts, creatine kinase, glycosylated hemoglobin, high sensitivity C-reactive protein and left ventricle ejection fraction.

#Tertile 3 NT-proBNP vs. Tertile 1-2 NT-proBNP

PR indicated plaque rupture; NPR indicated no plaque rupture

### Supplemental Table S2. Discrimination and Reclassification of 2-Year death by Different Models

| Models                             | NRI (95%CI)          | p value | IDI (95%CI)          | p value |
|------------------------------------|----------------------|---------|----------------------|---------|
| Risk factors                       | Ref.                 | -       | Ref.                 | -       |
| Risk factors+NT-proBNP             | -0.002(-0.011-0.006) | 0.564   | 0.003(-0.006-0.0013) | 0.512   |
| Risk factors+NT-proBNP+plaque type | 0.268(0.004-0.531)   | 0.046   | 0.051(0.010-0.092)   | 0.016   |

Notes: Risk factors included age, gender, hypertension, hyperlipidemia, diabetes, smoking, LDL, HsCRP, LVEF;

Abbreviations: MACE, major adverse cardiovascular events; NRI, net reclassification index; IDI, integrated discrimination improvement; CI, confidence interval.
